# Supplementary material for: The influence of volcanic eruptions on the climate of tropical South America during the last millennium in an isotope-enabled general circulation model
Source: Copernicus journal article supplement (doi:10.5194/cp-12-961-2016), 2016-04-15
Supplement: Supplementary file 1 [file cp-12-961-2016-supplement.pdf]

Supplement of Clim. Past, 12, 961–979, 2016  
<http://www.clim-past.net/12/961/2016/>  
doi:10.5194/cp-12-961-2016-supplement  
© Author(s) 2016. CC Attribution 3.0 License.

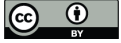

Climate  
of the Past

Open Access

The logo for the European Geosciences Union (EGU), featuring the letters 'EGU' in a bold, sans-serif font, with a circular arrow graphic around the 'E'.

*Supplement of*

## **The influence of volcanic eruptions on the climate of tropical South America during the last millennium in an isotope-enabled general circulation model**

**Christopher M. Colose et al.**

*Correspondence to:* Christopher M. Colose (ccolose@albany.edu)

The copyright of individual parts of the supplement might differ from the CC-BY 3.0 licence.

## Supplemental Figure Captions

**Fig. S1.** Number of rain gauges per grid box for selected months (during eruption events) in the GPCCv6 network. Bottom right panel shows a time-series of the total number of stations over the range 90° to 30° W and 60°S to 20° N.

**Fig. S2.** Zonally averaged latitudinal AOD distribution for all 15 events used in each ensemble member for DJF. Mean of all curves shown in red.

**Fig. S3.** As in Figure S2, but for JJA.

**Fig. S4.** Precipitation anomaly (mm day<sup>-1</sup>) for each volcanic eruption used in LM composite (each averaged for the three ensemble members used) during DJF.

**Fig. S5.** As in Figure S4, but for JJA.

**Fig. S6.** Global-scale precipitation anomaly (mm day<sup>-1</sup>) in the LM composite for (top) DJF and (bottom) JJA.

**Fig. S7.** Regression of spatially-averaged DJF  $\delta^{18}\text{O}_p$  anomaly vs. temperature (black squares) or precipitation (red squares). The regression uses all 45 LM volcanic events and averaging is done over the SAMS domain defined in the text. Black and red lines are the corresponding (least-squares) regression lines.

**Fig. S8.** **a)** DJF total  $\delta^{18}\text{O}_p$  anomaly **b)** DJF  $\delta^{18}\text{O}_p$  anomaly due to isotopic composition change in precipitation, holding precipitation seasonality fixed at pre-eruption values. **c)** As in a) except for JJA. **d)** As in b) except for JJA. Total isotopic changes in left column reproduced from Figure 10 in text.

## GPCC Gauge Density

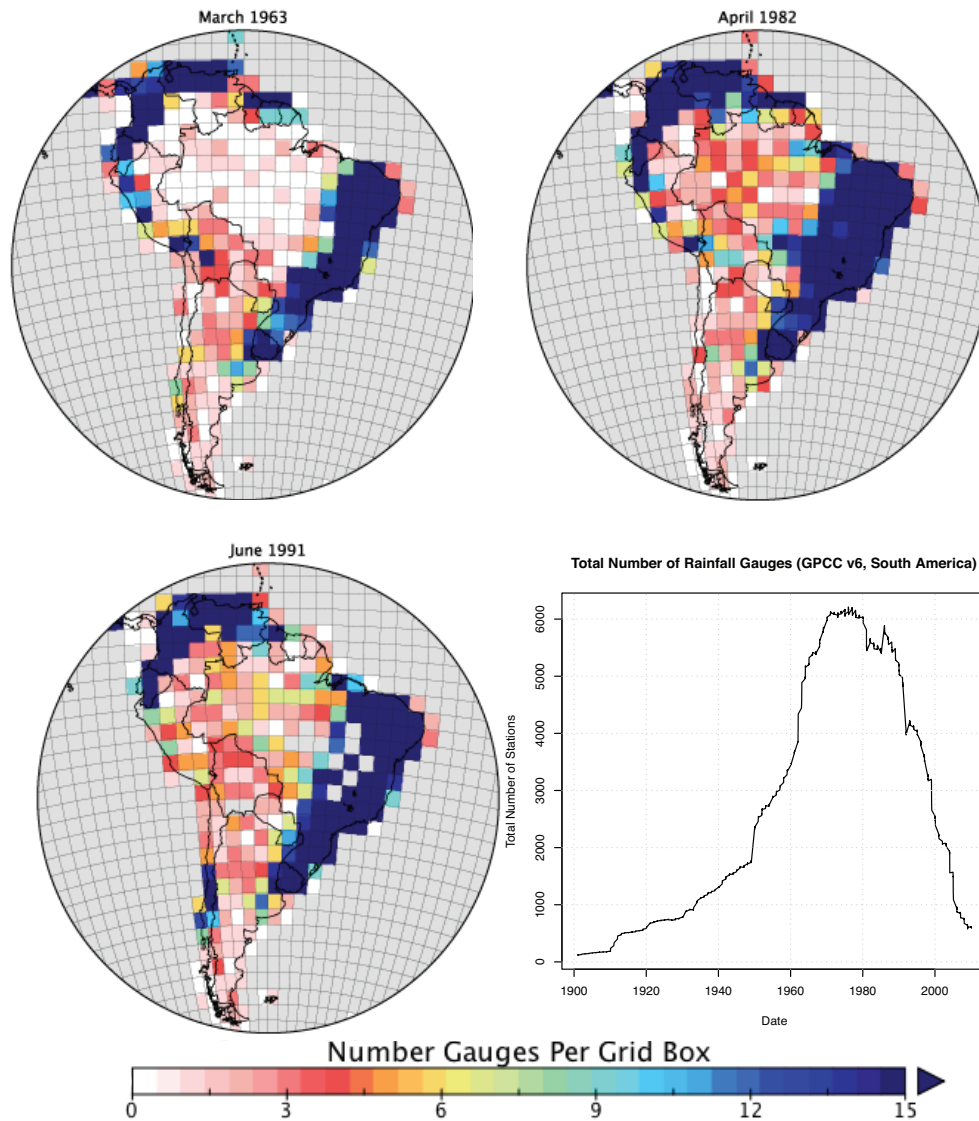

**Fig. S1.** Number of rain gauges per grid box for selected months (during eruption events) in the GPCCv6 network. Bottom right panel shows a time-series of the total number of stations over the range  $90^{\circ}$  to  $30^{\circ}$  W and  $60^{\circ}$ S to  $20^{\circ}$  N.

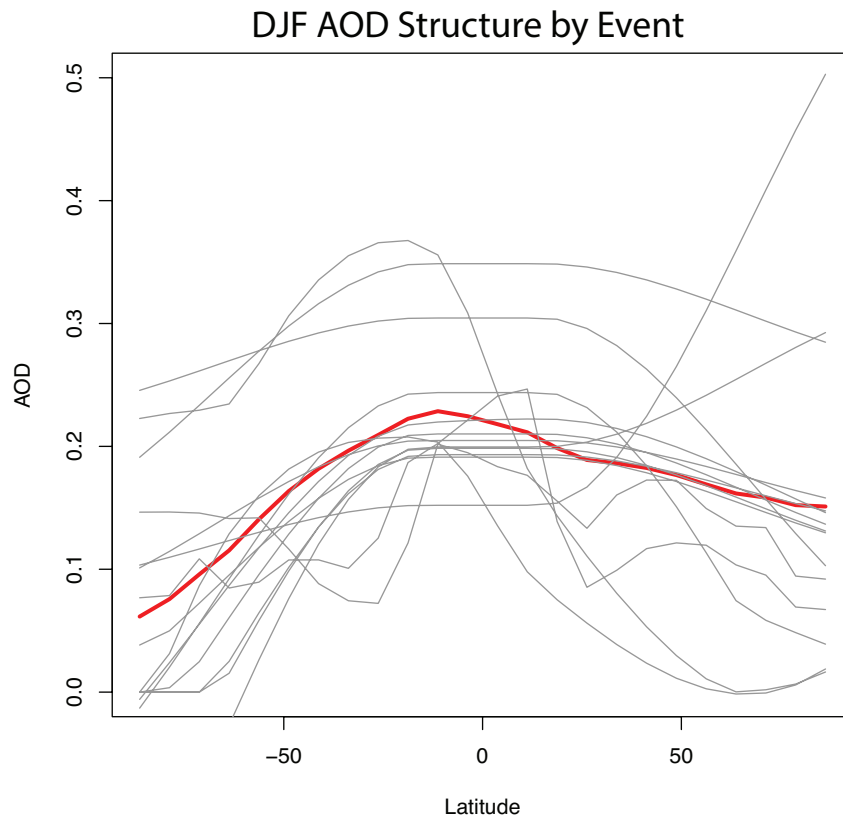

**Fig. S2.** Zonally averaged latitudinal AOD distribution for all 15 events used in each ensemble member for DJF. Mean of all curves shown in red.

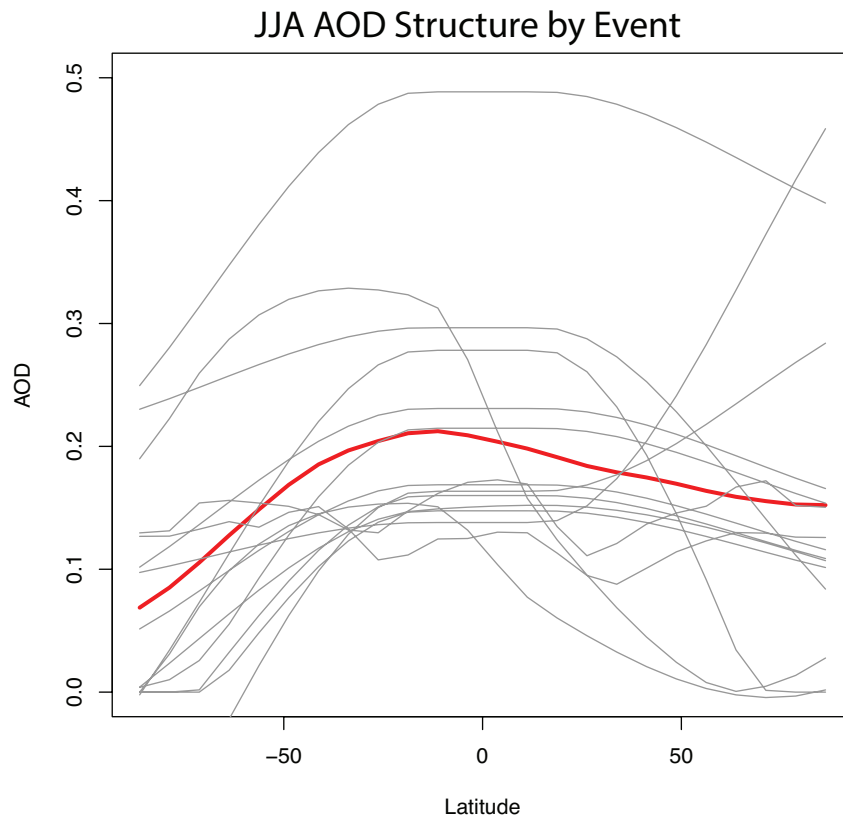

**Fig. S3.** As in Figure S2, but for JJA.

### DJF PRECIPITATION BY EVENT

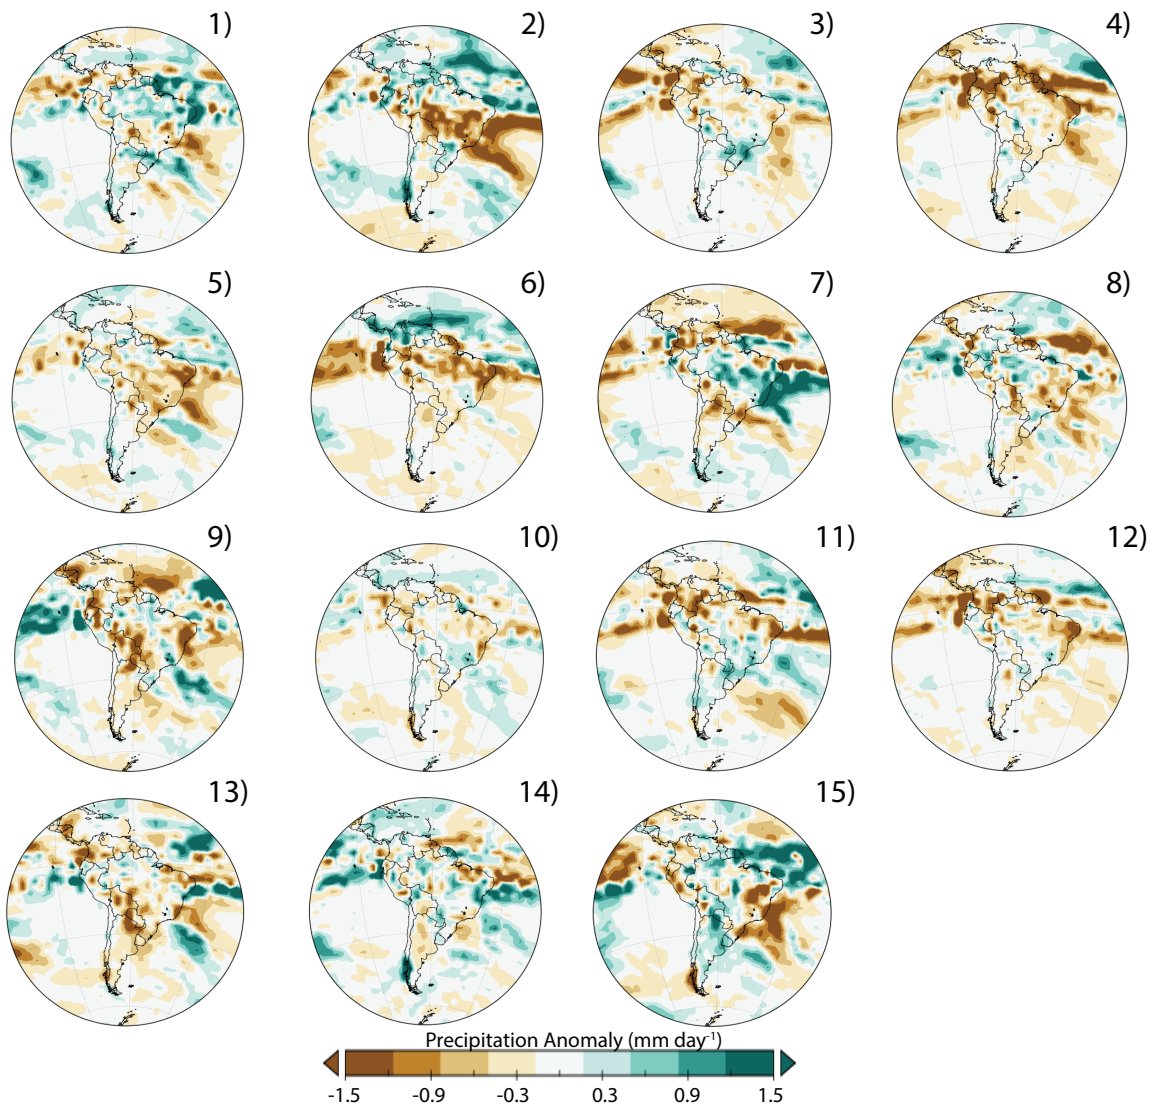

**Fig. S4.** Precipitation anomaly ( $\text{mm day}^{-1}$ ) for each volcanic eruption used in LM composite (each averaged for the three ensemble members used) during DJF.

JJA PRECIPITATION BY EVENT

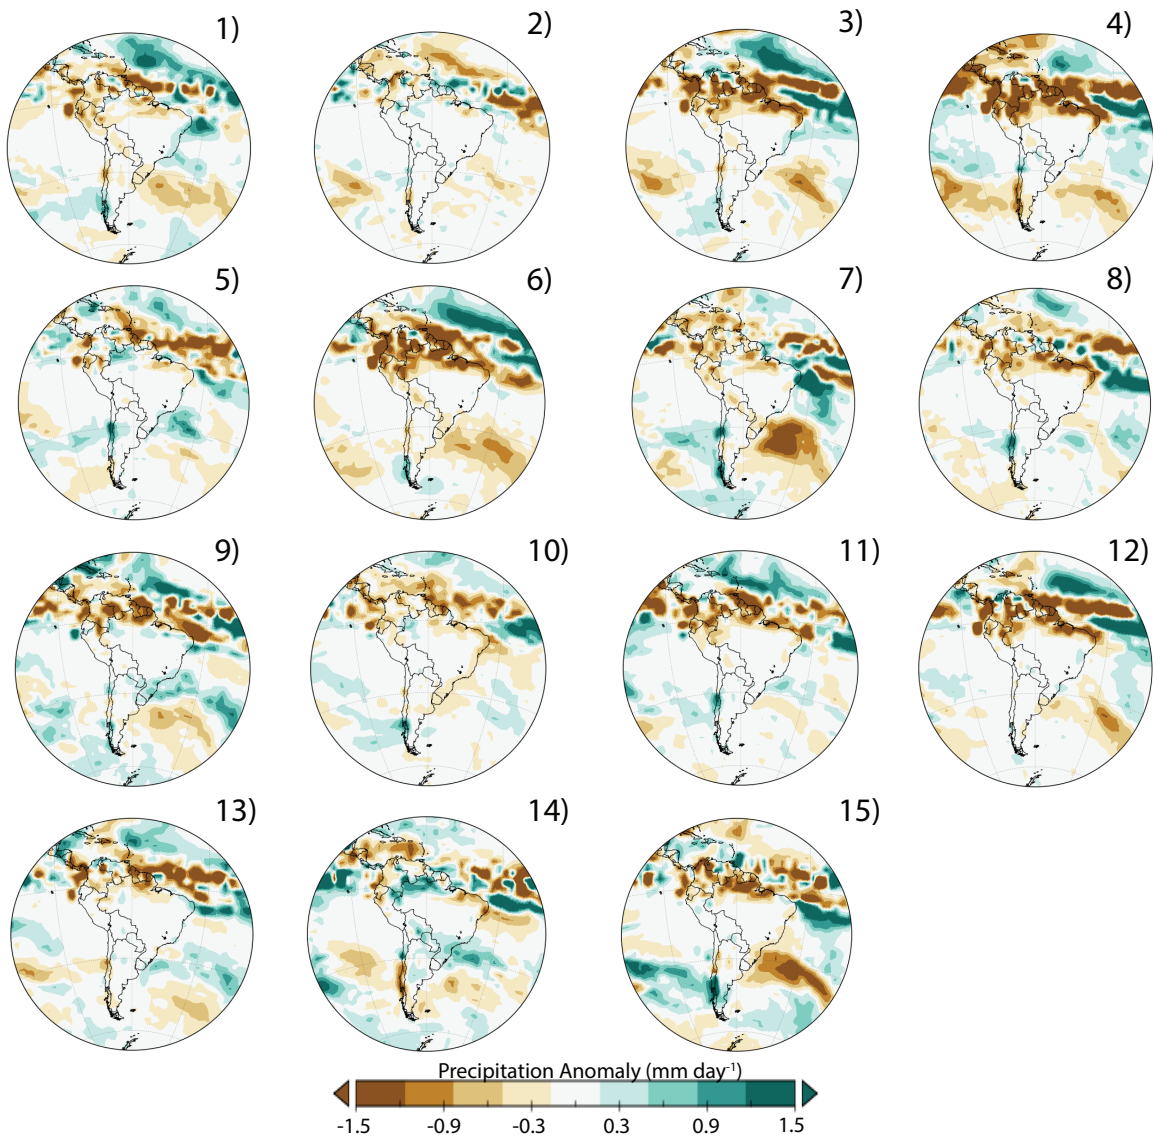

**Fig. S5.** As in Figure S4, but for JJA.

# Global LM Precipitation Anomaly Composite

DJF

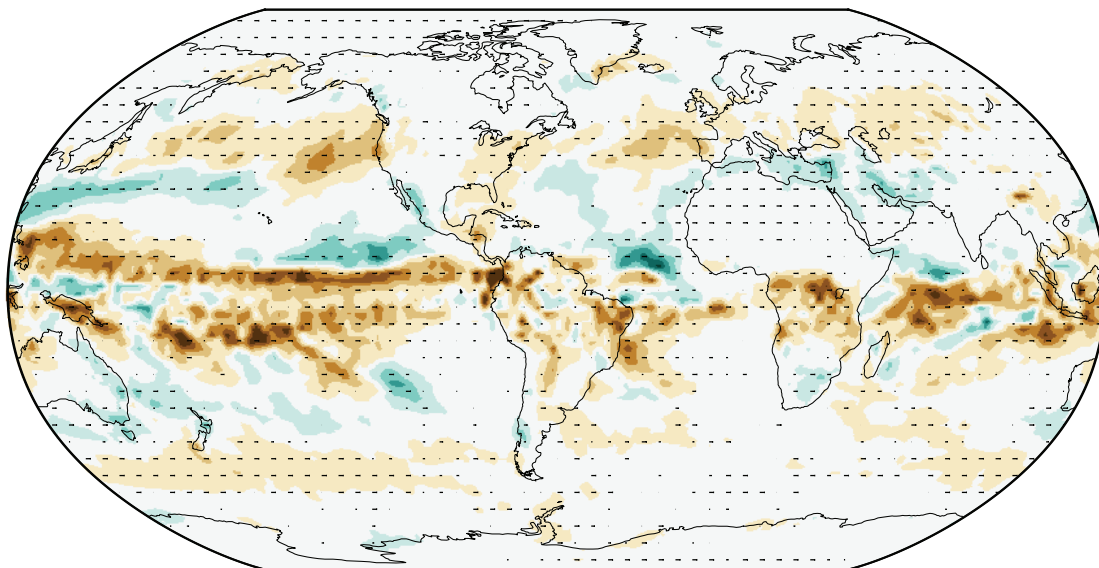

JJA

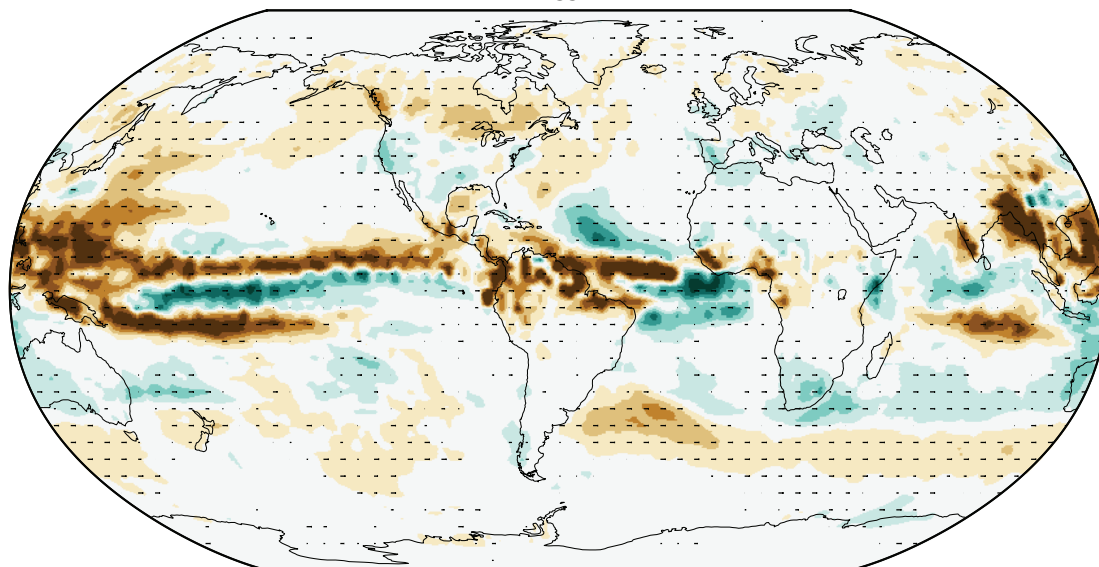

Precipitation Anomaly ( $\text{mm day}^{-1}$ )

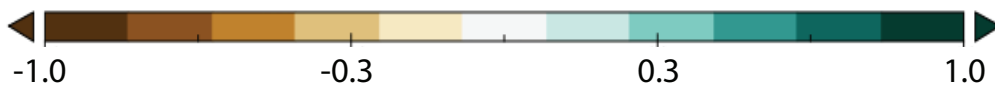

**Fig. S6.** Global-scale precipitation anomaly ( $\text{mm day}^{-1}$ ) in the LM composite for (top) DJF and (bottom) JJA.



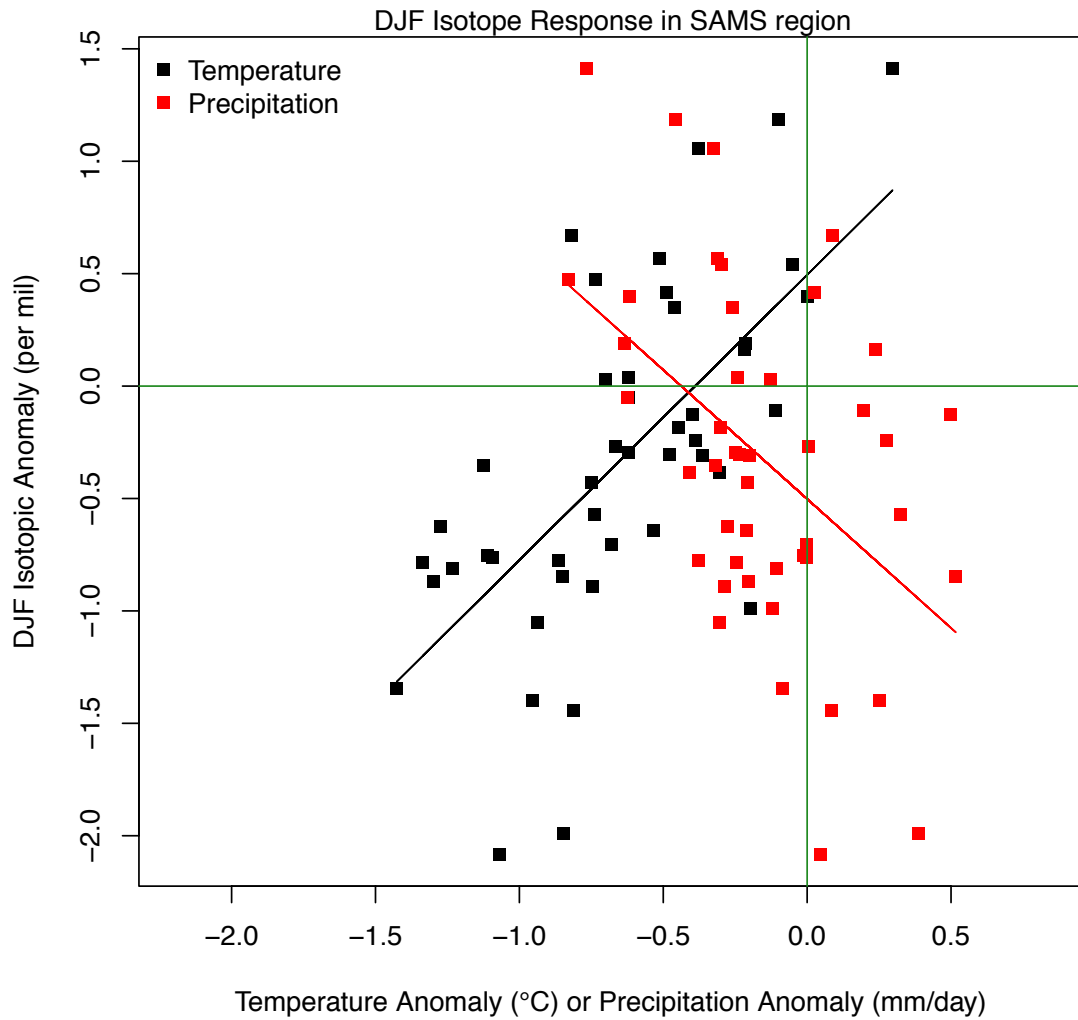

**Fig. S7.** Regression of spatially-averaged DJF  $\delta^{18}\text{O}_p$  anomaly vs. temperature (black squares) or precipitation (red squares). The regression uses all 45 LM volcanic events and averaging is done over the SAMS domain defined in the text. Black and red lines are the corresponding (least-squares) regression lines.

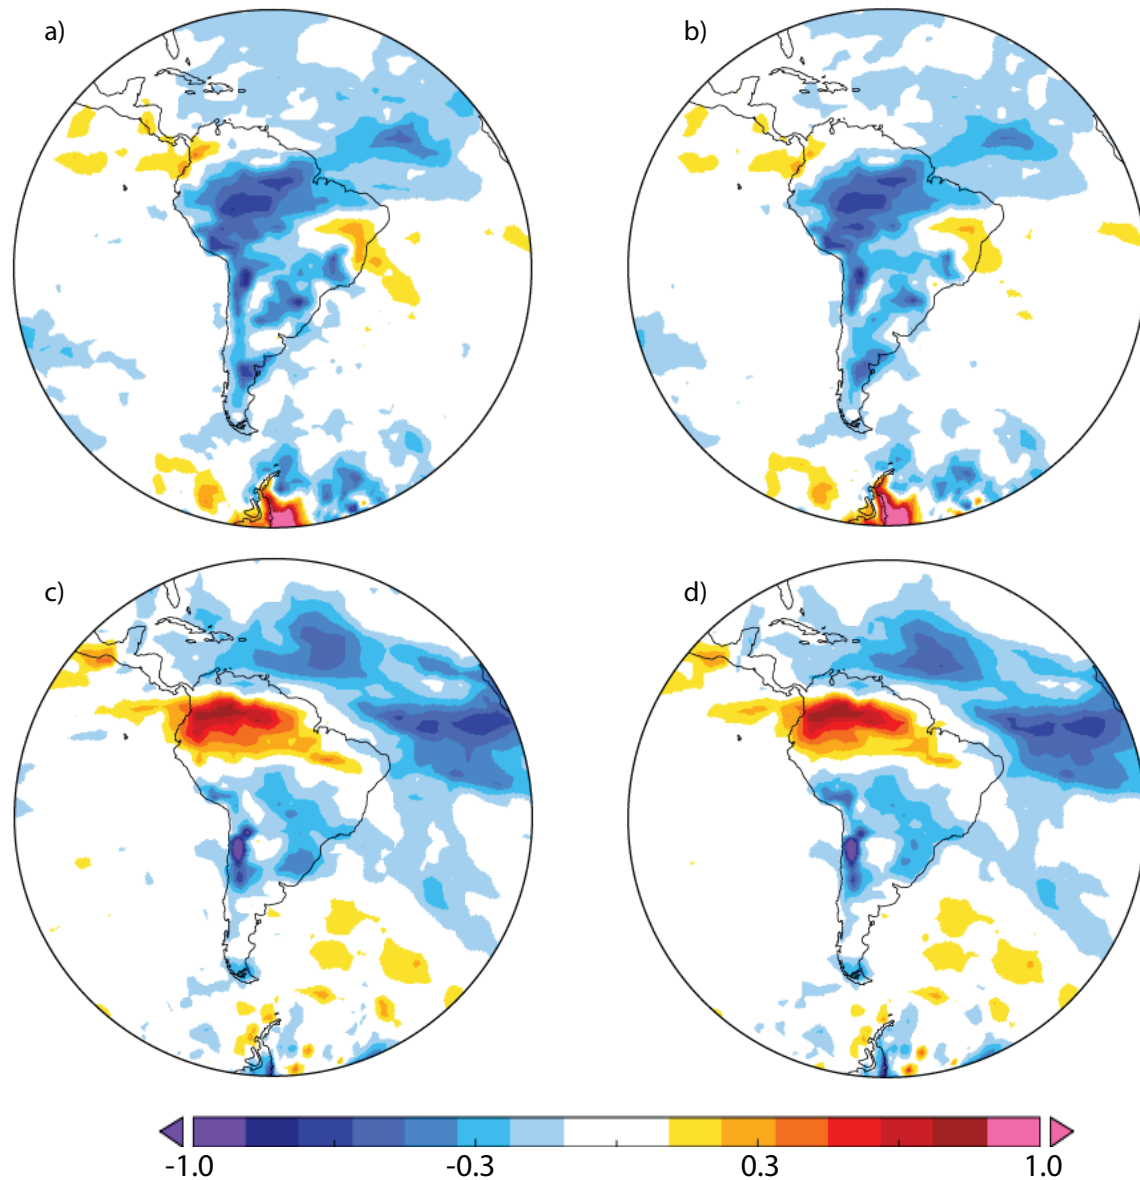

**Fig. S8.** **a)** DJF total  $\delta^{18}\text{O}_p$  anomaly **b)** DJF  $\delta^{18}\text{O}_p$  anomaly due to isotopic composition change in precipitation, holding precipitation seasonality fixed at pre-eruption values. **c)** As in a) except for JJA. **d)** As in b) except for JJA. Total isotopic changes in left column reproduced from Figure 10 in text.
